# Supplementary material for: Room temperature phosphorescence of Mn(ii) and Zn(ii) coordination polymers for photoelectron response applications
Source: Royal Society of Chemistry journal article supplement (doi:10.1039/c9dt02178g), 2019-01-01
Supplement: c9dt02178g1.pdf [file c9dt02178g1.pdf]

**Electronic Supporting Information**

**Room Temperature Phosphorescence of Mn(II) and Zn(II)  
Coordination Polymers for Photoelectron Response Applications**

**Xiao-Gang Yang,<sup>a</sup> Zhi-Min Zhai,<sup>ab</sup> Xiao-Min Lu,<sup>a</sup> Ying Zhao,<sup>ac</sup> Xin-Hong Chang,<sup>a</sup>  
and Lu-Fang Ma<sup>\*ab</sup>**

*<sup>a</sup> College of Chemistry and Chemical Engineering, Henan Province Function-Oriented Porous Materials Key Laboratory, Luoyang Normal University, Luoyang 471934, P. R. China.*

*<sup>b</sup> College of Chemistry and Molecular Engineering, Zhengzhou University, Zhengzhou 450001, P. R. China.*

*<sup>c</sup> State Key Laboratory of Coordination Chemistry, School of Chemistry and Chemical Engineering, Nanjing University, Nanjing 210093, P. R. China.*

*E-mail: mazhuxp@126.com*

## A. Experimental Section.

**1. Materials and general procedures.** All of the chemicals and reagents are commercially available and can be used directly without secondary treatment. Single-crystal X-ray diffraction data for  $[\text{Mn}_{0.5}(\text{NH}_3\text{IPA})(\text{H}_2\text{O})]$  (Mn-CP) and  $[\text{Zn}(\text{NH}_2\text{IPA})(\text{H}_2\text{O})]$  (Zn-CP) were collected at room temperature on an Oxford Diffraction SuperNova area-detector diffractometer using mirror optics monochromated Mo  $K\alpha$  radiation ( $\lambda = 0.71073 \text{ \AA}$ ). The data collection, data reduction and empirical absorption correction were obtained by using CrysAlisPro.<sup>1</sup> The crystal structure was solved by using SHELXS-2014 and least-squares refined with SHELXL-2014,<sup>2</sup> and using anisotropic thermal displacement parameters for all non-hydrogen atoms. The crystallographic data for Mn-CP and Zn-CP are listed in Table S1. The crystallographic data for Mn-CP and Zn-CP are listed in Table S1. CCDC Nos. 1917025 and 1917026 contain the supplementary crystallographic data for Mn-CP and Zn-CP, respectively. This material can be obtained free of charge via <http://www.ccdc.cam.ac.uk/conts/retrieving.html>, or from the Cambridge Crystallographic Data Centre, 12 Union Road, Cambridge CB2 1EZ, UK; fax: (+44) 1223-336-033; or E-mail: [deposit@ccdc.cam.ac.uk](mailto:deposit@ccdc.cam.ac.uk).

The powder X-ray diffraction (PXRD) patterns were collected on a Bruker D8-ADVANCE X-ray diffractometer with Cu  $K\alpha$  radiation ( $\lambda = 1.5418 \text{ \AA}$ ). Measurements were made in a  $2\theta$  range of  $5\text{--}50^\circ$  at room temperature with a step of  $0.02^\circ$  ( $2\theta$ ), a counting time of 0.2 s/step and the operating power was 40 KV, 40 mA. Thermogravimetric analysis (TGA) experiments were carried out using SII EXSTAR6000 TG/DTA6300 thermal analyzer from room temperature to  $800^\circ\text{C}$  under

a nitrogen atmosphere at a heating rate of 10 °C min<sup>-1</sup>. The C, H, N analyses were carried out using a Perkin–Elmer Elementar vario elemental analysis instrument.

Photographs of NH<sub>3</sub>IPA·0.5H<sub>2</sub>O, NH<sub>2</sub>IPA, Mn-CP and Zn-CP under UV excitation (365 nm) and day light were captured using a Canon digital camera (EOS 700D: the ISO value was 400, time of exposure was set to an automatic mode). Room temperature photoluminescence (PL) spectra and time-resolved lifetime were conducted on an Edinburgh FLS1000 fluorescence spectrometer. The fluorescence spectra were measured by a continuous radiation of xenon arc lamp (Xe900). While the phosphorescence spectra and phosphorescence decay curves were tested by a pulsing radiation of microsecond flash lamp with time-resolved single photon counting–multi-channel scaling (MCS) mode. The phosphorescence quantum yields (QY) at room temperature were estimated using an integrating sphere (F-M101, Edinburgh) accessory in FLS1000 fluorescence spectrometer.

Optoelectronic measurements were performed with a CHI 660E electrochemical analyzer (CH Instruments, Chenhua Co., Shanghai, China) in a standard three-electrode system using Mn/Zn-CP powder modified indium tin oxide (ITO) as the working electrode with a working area of 1.0 cm<sup>2</sup>, a platinum wire electrode as a counter electrode, Ag/AgCl as a reference electrode, and 0.5 M Na<sub>2</sub>SO<sub>4</sub> aqueous solution as electrolyte. The system was conducted in a quartz glass reactor ca. 50 cm<sup>3</sup>, and irradiated by a 300 W xenon lamp. The cyclic voltammograms (CV) was measured with a scan rate of 50 mV/s. Transient current density–time characteristics was tested at bias potential of 0 and -0.6 V vs. Ag/AgCl, respectively.

## 2. Synthesis of Mn-CP and Zn-CP crystals

### 2.1 Synthesis of Mn-CP crystals

A mixture of  $\text{NH}_3\text{IPA}\cdot 0.5\text{H}_2\text{O}$  (0.5 mmol, 90.5 mg),  $\text{MnSO}_4\cdot \text{H}_2\text{O}$  (1 mmol, 169.0 mg), acetonitrile (2mL) and  $\text{H}_2\text{O}$  (6 mL) was placed in a Teflon-lined stainless steel vessel, heated to 120 °C for three days, and then cooled to room temperature naturally. Light pink block crystals of Mn-CP were obtained, which were filtered, washed with water and ethanol several times, then dried under room temperature. Elemental analysis: Calc. (%) for  $\text{C}_8\text{H}_8\text{Mn}_{0.5}\text{NO}_5$ : C, 42.59; H, 3.57; N, 6.21; found (%): C, 43.11; H, 3.99; N, 6.79.

### 2.1 Synthesis of Zn-CP crystals

A mixture of  $\text{NH}_3\text{IPA}\cdot 0.5\text{H}_2\text{O}$  (0.5 mmol, 90.5 mg),  $\text{ZnSO}_4\cdot 7\text{H}_2\text{O}$  (1 mmol, 287.5 mg), acetonitrile (2mL) and  $\text{H}_2\text{O}$  (6 mL) was placed in a Teflon-lined stainless steel vessel, heated to 120 °C for three days, and then cooled to room temperature naturally. Light brown block crystals of Zn-CP were obtained, which were filtered, washed with water and ethanol several times, then dried under room temperature. Elemental analysis: Calc. (%) for  $\text{C}_8\text{H}_7\text{ZnNO}_5$ : C, 36.59; H, 2.69; N, 5.34; found (%): C, 37.02; H, 2.09; N, 6.03.

Crystalline state of  $\text{NH}_3\text{IPA}\cdot 0.5\text{H}_2\text{O}$  sample was commercially available from Tokyo Chemical Industry Co. Ltd. A mixture of  $\text{NH}_3\text{IPA}\cdot 0.5\text{H}_2\text{O}$  (1 mmol, 181.0 mg) and EtOH (8 mL) was placed in a Teflon-lined stainless steel vessel, heated to 120 °C for 4 h, and then cooled to room temperature naturally. Light yellow block crystals of  $\text{NH}_2\text{IPA}$  can be obtained from the clear liquid.

### **3. Electronic structure calculations**

All calculations were performed with the density functional theory (DFT) method using Dmol<sup>3</sup> module in Material Studio software package.<sup>3</sup> Herein, the structure mode were directly used from the “cif” files of NH<sub>3</sub>IPA·0.5H<sub>2</sub>O, NH<sub>2</sub>IPA and Mn/Zn-CP. The initial configuration was fully optimized by Perdew-Wang (PW91) generalized gradient approximation (GGA) method with the double numerical basis sets plus polarization function (DNP).

## B. Supporting Figures

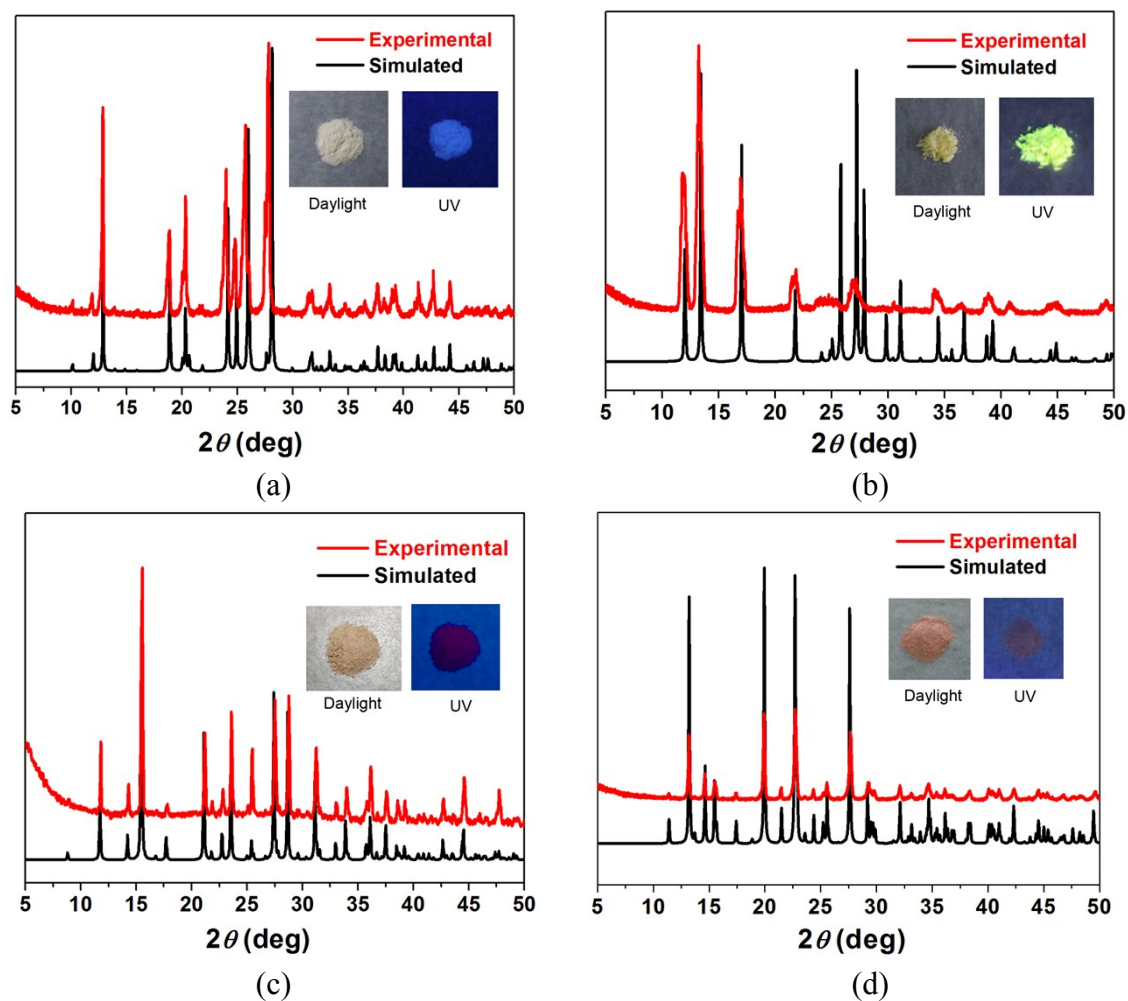

**Figure S1.** PXRD patterns of  $\text{NH}_3\text{IPA} \cdot 0.5\text{H}_2\text{O}$  (a)  $\text{NH}_2\text{IPA}$  (b) and Mn-CP (c) and Zn-CP (d) crystal samples.

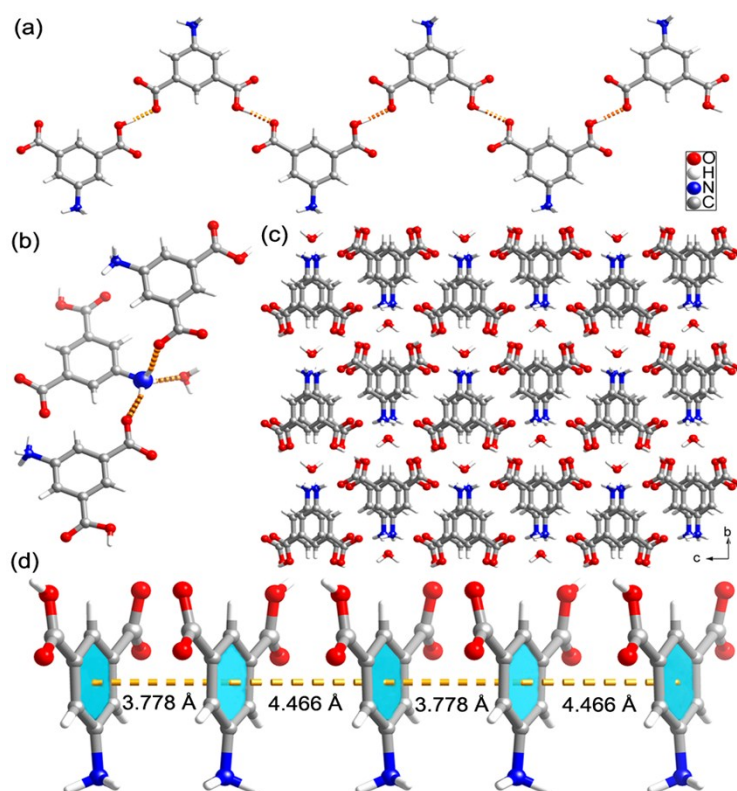

**Figure S2.** View of 1D zig-zag chain (a) and N/O-H...O hydrogen bonding between adjacent  $\text{NH}_3\text{IPA}$  molecules (b). (c) 3D supramolecular network of  $\text{NH}_3\text{IPA} \cdot 0.5\text{H}_2\text{O}$ . (d) Alternating arrangement of  $\pi \cdots \pi$  stacking between  $\text{NH}_3\text{IPA}$  molecules.

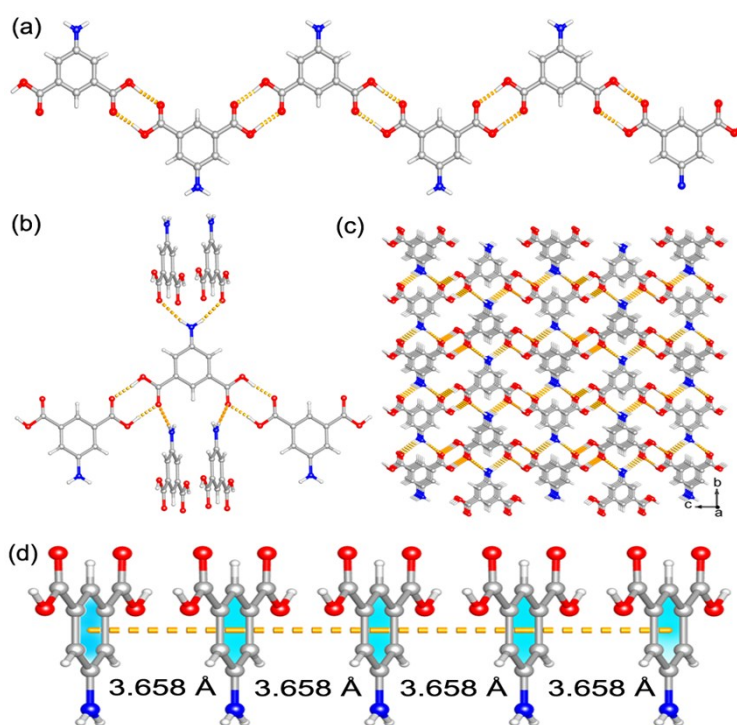

**Figure S3.** View of 1D zig-zag chain (a) and N/O-H...O hydrogen bonding between adjacent  $\text{NH}_2\text{IPA}$  molecules (b). (c) 3D supramolecular network of  $\text{NH}_2\text{IPA}$ . (d) Arrangement of  $\pi \cdots \pi$  stacking between  $\text{NH}_2\text{IPA}$  molecules.

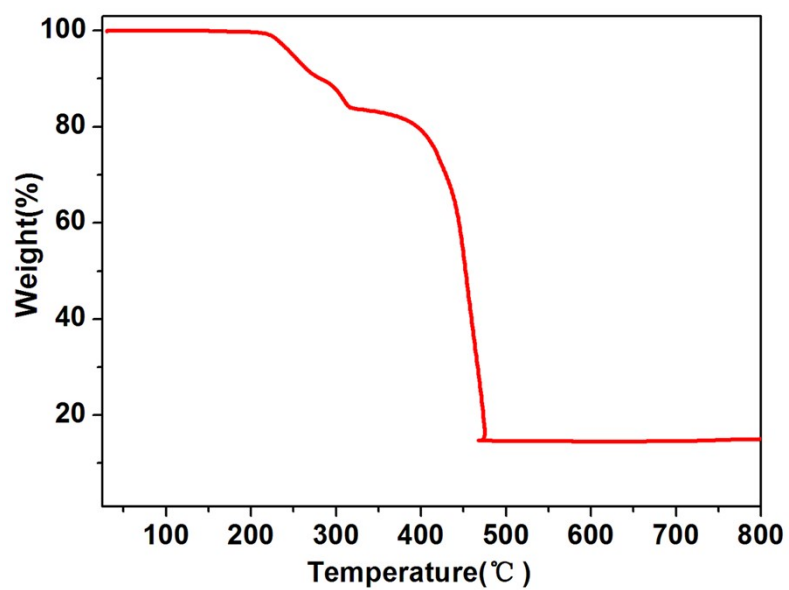

(a)

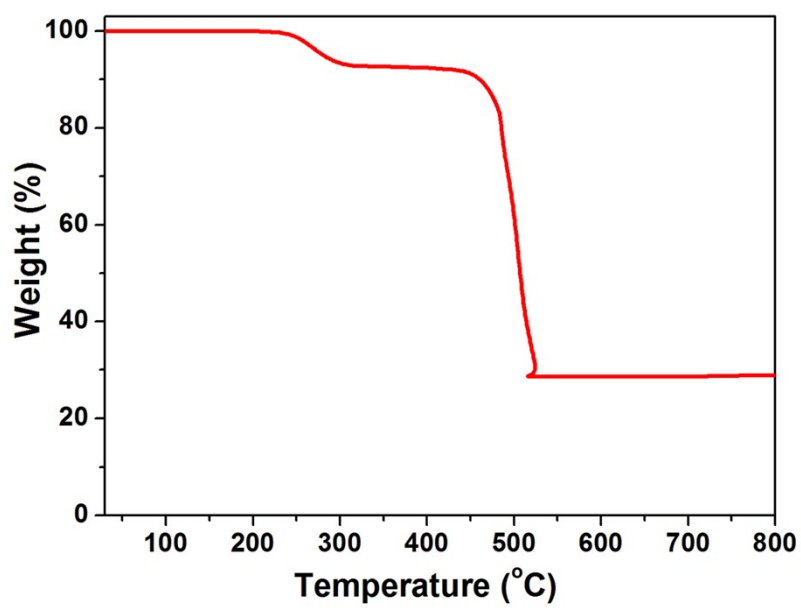

(b)

**Figure S4.** TGA curves for Mn-CP (a) and Zn-CP (b) crystal samples.



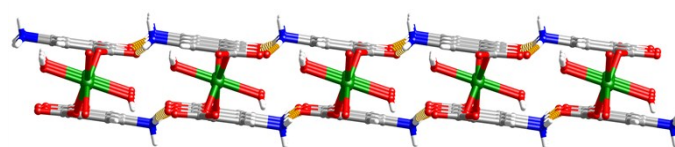

(a)

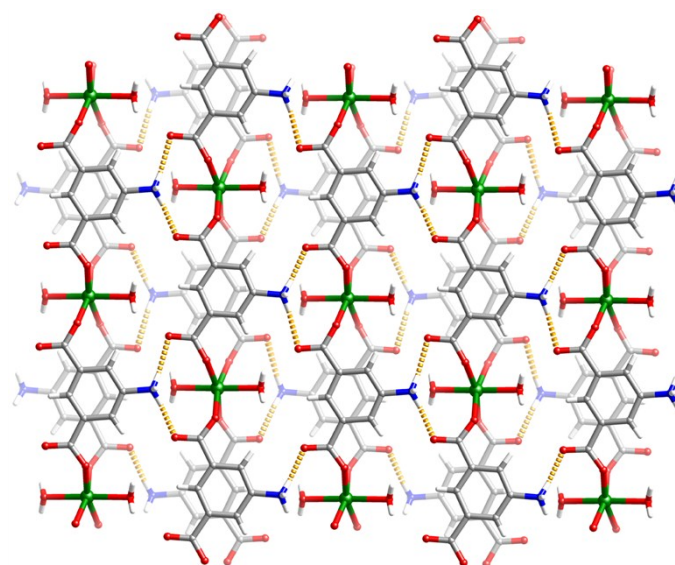

(b)

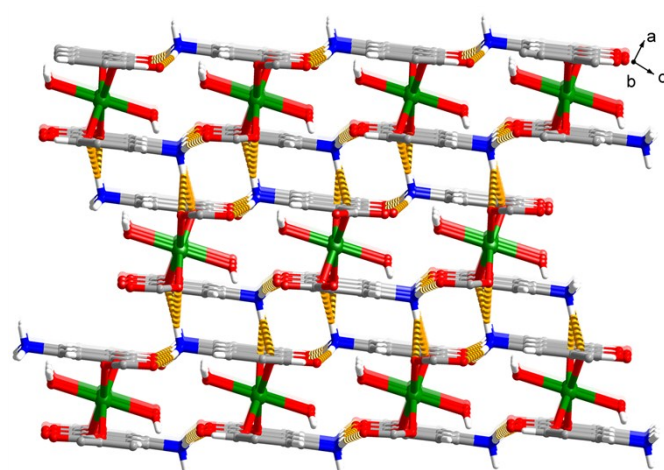

(c)

**Figure S5.** View of the 2D layer for Mn-CP along  $a$  (a) and  $b$  (b) direction. (c) View of the 3D network along  $b$  direction.

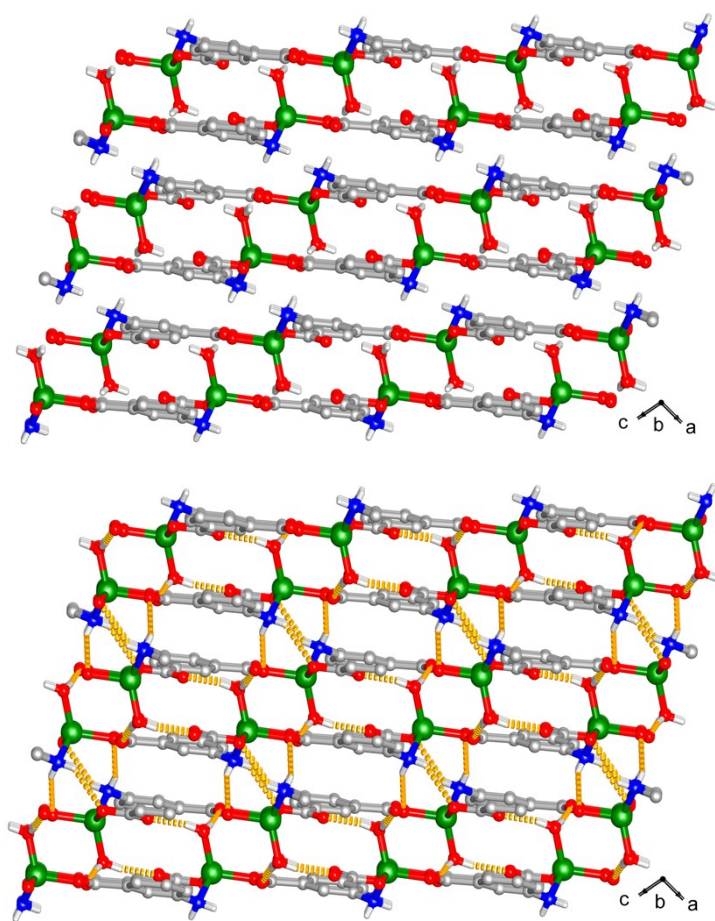

**Figure S6.** View of the 3D network of Zn-CP along *b* direction extended from 2D layer through N–H $\cdots$ O and O–H $\cdots$ O hydrogen bonding.

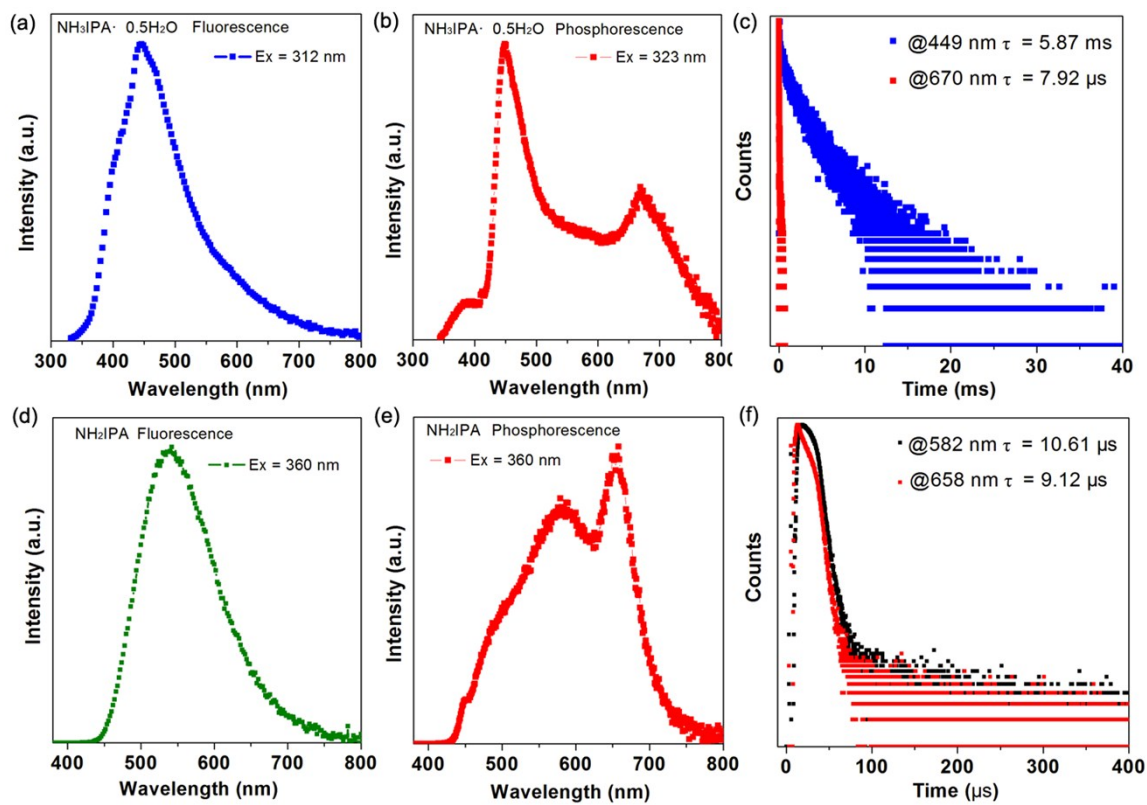

**Figure S7.** Fluorescence/phosphorescence spectra and phosphorescence decay curves of  $\text{NH}_3\text{IPA} \cdot 0.5\text{H}_2\text{O}$  and  $\text{NH}_2\text{IPA}$  at room temperature.

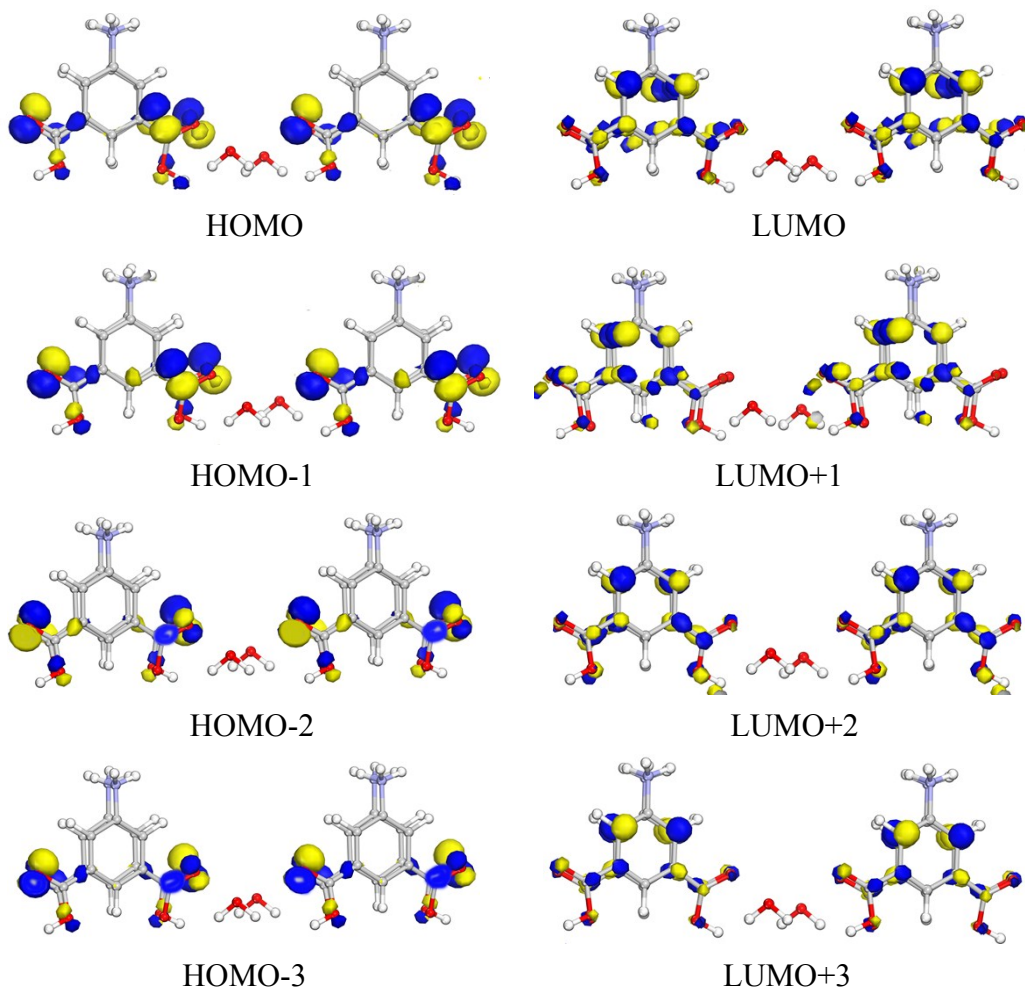

**Figure S8.** The distributions of highest occupied molecular orbitals (HOMO) and lowest unoccupied molecular orbitals (LUMO) of  $\text{NH}_3\text{IPA} \cdot 0.5\text{H}_2\text{O}$ . It can be observed that HOMO and LUMO are separate between  $-\text{COOH}/-\text{COO}^-$  groups and benzene ring owing to the large torsion angles between two carboxylic groups and benzene rings.

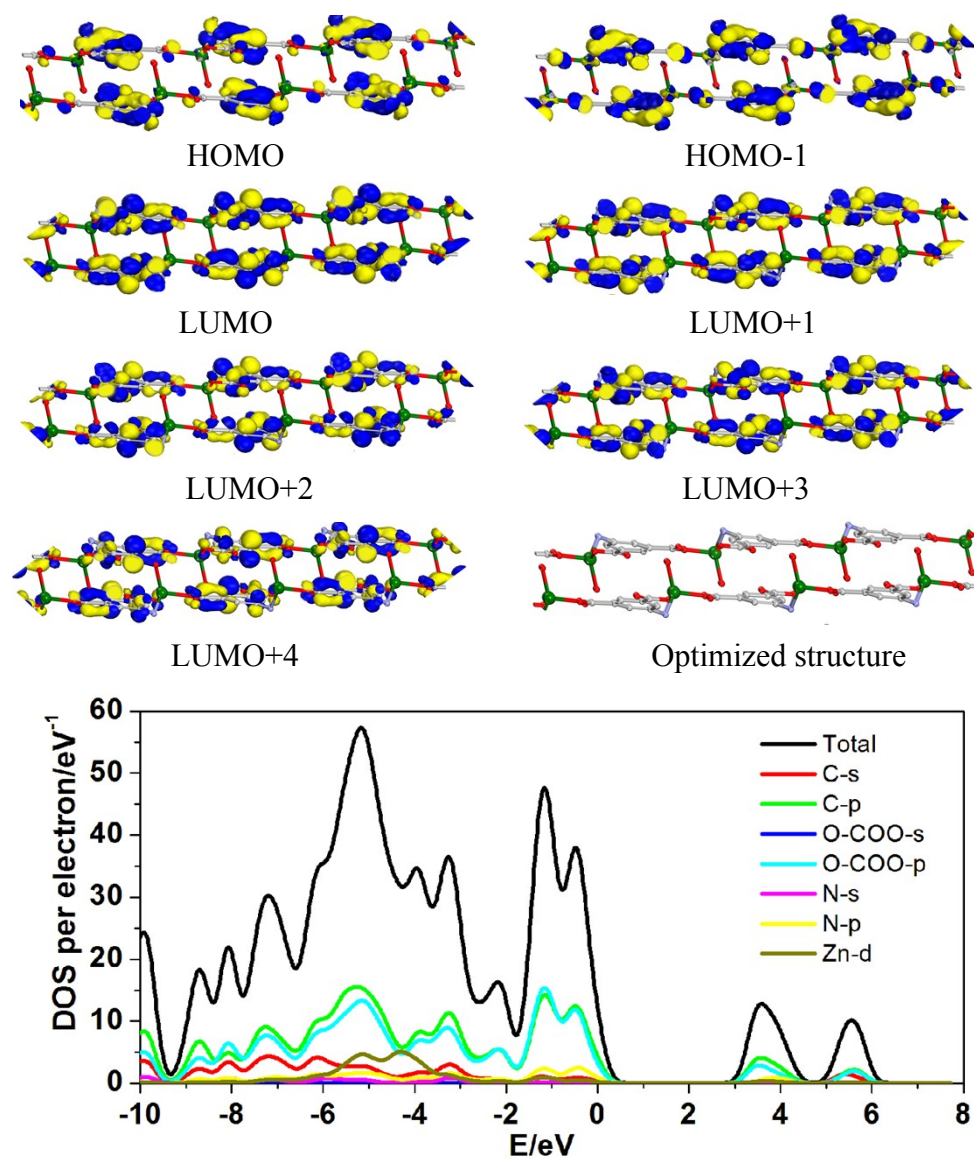

**Figure S9.** The optimized structure, the distributions of HOMOs/LUMOs, and TDOS/PDOS of Zn-CP.



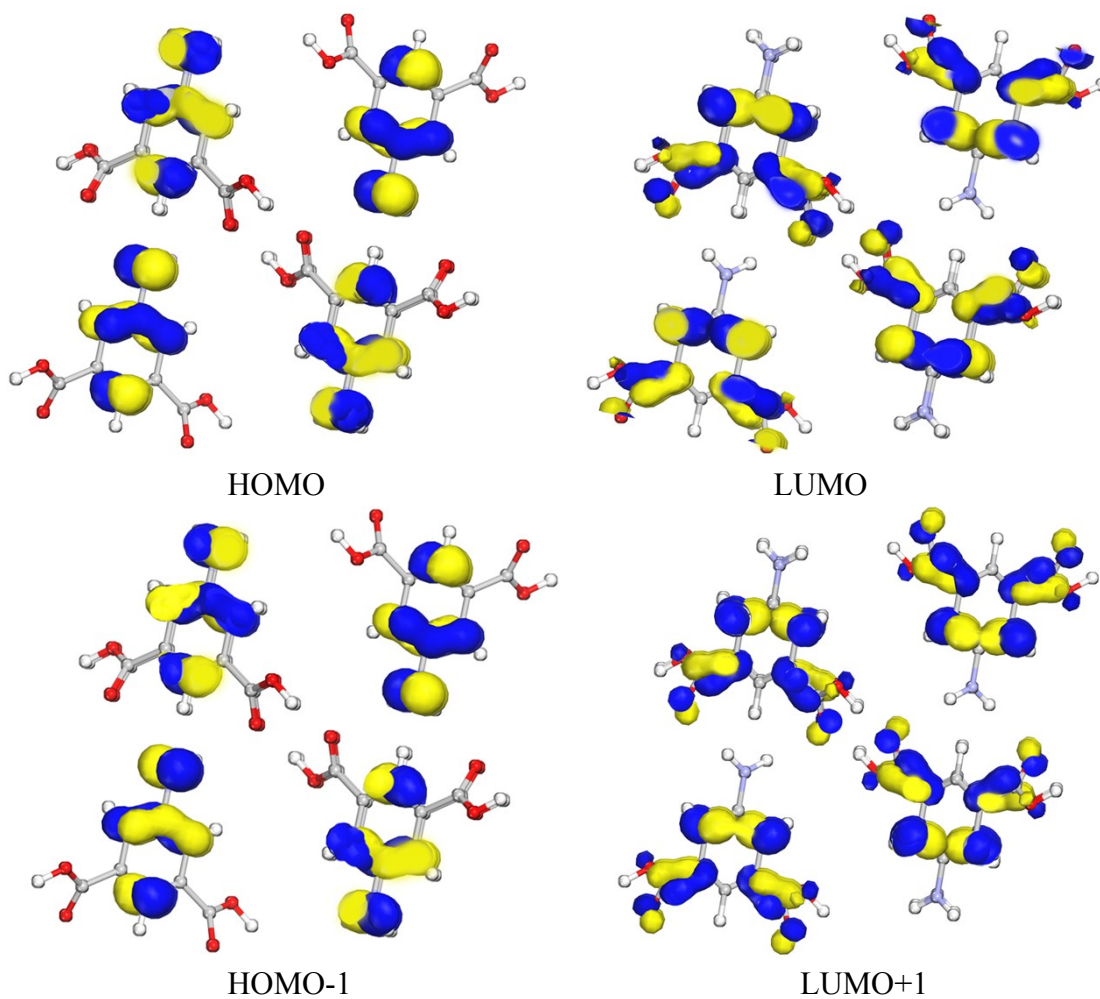

**Figure S10.** The distributions of highest occupied molecular orbitals (HOMO) and lowest unoccupied molecular orbitals (LUMO) of  $\text{NH}_2\text{IPA}$ . It can be observed that the electron cloud can transfer from  $-\text{NH}_2\text{IPA}$  to  $-\text{COOH}$  group through benzene ring.

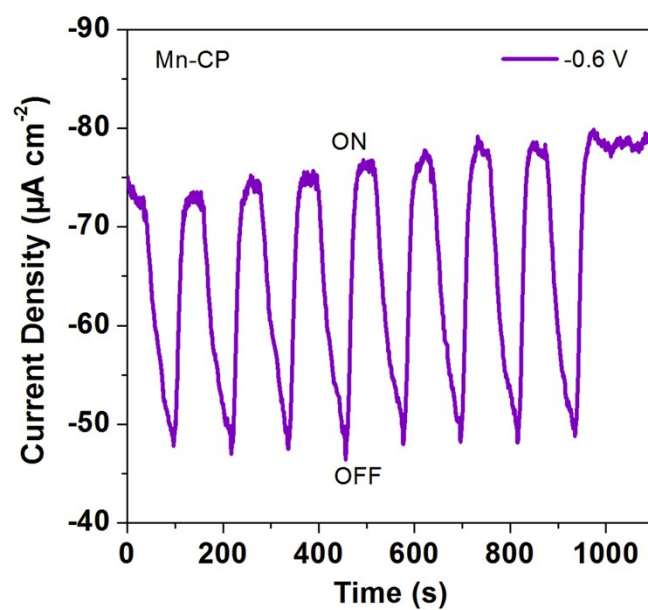

(a)

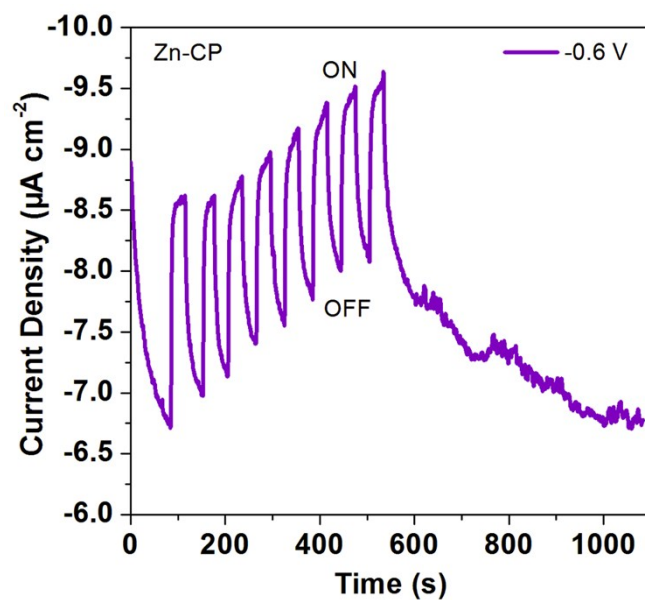

(b)

**Figure S11.** Transient current–time characteristics of Mn-CP (a) and Zn-CP (b) in 0.5 M Na<sub>2</sub>SO<sub>4</sub> aqueous solution at -0.6 V bias potential (vs. Ag/AgCl).

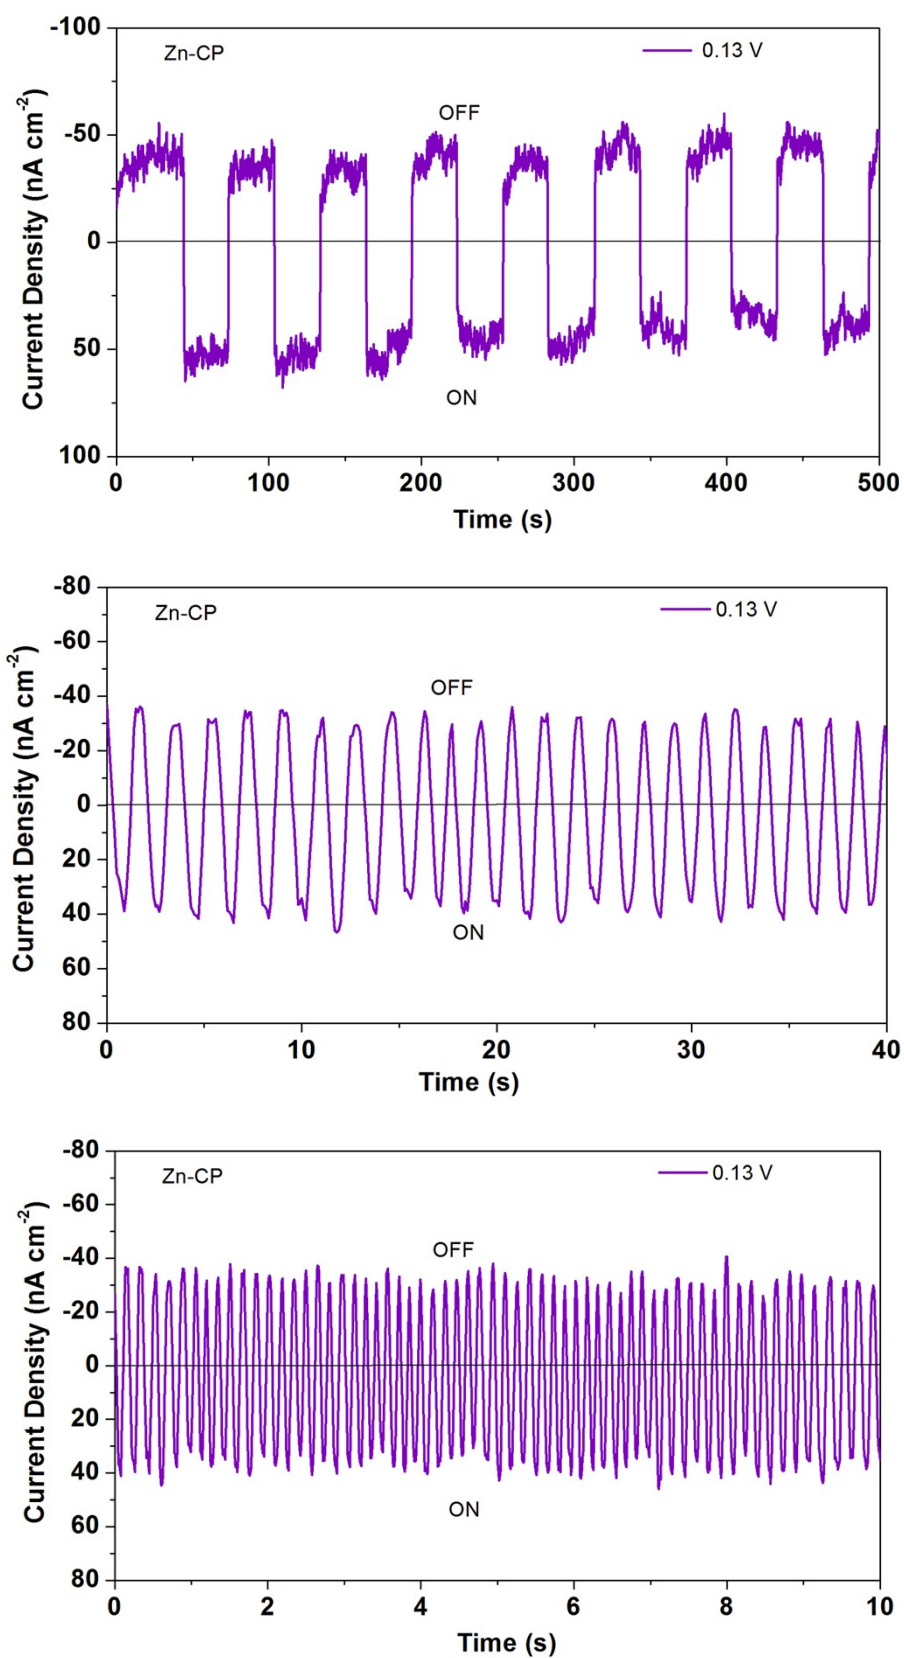

**Figure S12.** Alternating current with frequency tunable of Zn-CP at bias potential of 0.13 V by changing the period of on–off illumination.



**Table S1.** Crystallographic data for [Mn(NH<sub>3</sub>IPA)<sub>2</sub>(H<sub>2</sub>O)<sub>2</sub>] and [Zn(NH<sub>2</sub>IPA)(H<sub>2</sub>O)].

| Samples                                                          | [Mn <sub>0.5</sub> (NH <sub>3</sub> IPA)(H <sub>2</sub> O)]<br>(Mn-CP) | [Zn(NH <sub>2</sub> IPA)(H <sub>2</sub> O)]<br>(Zn-CP) |
|------------------------------------------------------------------|------------------------------------------------------------------------|--------------------------------------------------------|
| Chemical formula                                                 | C <sub>8</sub> H <sub>8</sub> Mn <sub>0.5</sub> NO <sub>5</sub>        | C <sub>8</sub> H <sub>7</sub> ZnNO <sub>5</sub>        |
| Formula weight                                                   | 225.63                                                                 | 262.54                                                 |
| CCDC NO.                                                         | 1917025                                                                | 1917026                                                |
| Crystal system                                                   | Monoclinic                                                             | Monoclinic                                             |
| Space group                                                      | <i>P2<sub>1</sub>/n</i>                                                | <i>P2<sub>1</sub>/n</i>                                |
| <i>a</i> (Å)                                                     | 7.0170(6)                                                              | 9.0595(9)                                              |
| <i>b</i> (Å)                                                     | 10.0069(8)                                                             | 8.2813(7)                                              |
| <i>c</i> (Å)                                                     | 11.4671(9)                                                             | 11.6454(13)                                            |
| $\alpha$ (°)                                                     | 90                                                                     | 90.00                                                  |
| $\beta$ (°)                                                      | 94.909(7)                                                              | 100.894(10)                                            |
| $\gamma$ (°)                                                     | 90                                                                     | 90.00                                                  |
| <i>V</i> (Å <sup>3</sup> )                                       | 802.25(11)                                                             | 857.94(15)                                             |
| <i>Z</i>                                                         | 4                                                                      | 4                                                      |
| <i>D</i> (g cm <sup>-3</sup> )                                   | 1.8679                                                                 | 2.0324                                                 |
| $\mu$ (mm <sup>-1</sup> )                                        | 0.892                                                                  | 2.863                                                  |
| <i>R</i> <sub>int</sub>                                          | 0.0327                                                                 | 0.0675                                                 |
| Goof                                                             | 1.012                                                                  | 0.911                                                  |
| <i>R</i> <sub>1</sub> <sup>a</sup> ( <i>I</i> > 2σ( <i>I</i> ))  | 0.0531                                                                 | 0.0599                                                 |
| <i>wR</i> <sub>2</sub> <sup>a</sup> ( <i>I</i> > 2σ( <i>I</i> )) | 0.1393                                                                 | 0.0969                                                 |

$$^a R_1 = \Sigma(|F_o| - |F_c|)/\Sigma|F_o|; ^b wR_2 = [\Sigma w(|F_o|^2 - |F_c|^2)^2/\Sigma w(F_o^2)^2]^{1/2}$$

## D. Supporting References

- [1] CrysAlisPro, Rigaku Oxford Diffraction, Version 1.171.39.6a.
- [2] (a) G. M. Sheldrick, *Acta Crystallogr. Sect. A*. 2008, **A64**, 112–122; (b) G. M. Sheldrick, *Acta Cryst.* 2015, **A71**, 3–8.
- [3] (a) B. Delley, *J. Chem. Phys.* 1990, **92**, 508–517; (b) B. Delley, *J. Chem. Phys.* 2000, **113**, 7756–7764; (c) Dmol<sup>3</sup> Module, MS Modeling, Version 2.2; Accelrys Inc.: San, Diego, 2003; (d) J. P. Perdew, J. A. Chevary, S. H. Vosko, K. A. Jackson, M. R. Pederson, D. J. Singh, C. Fiolhais, *Phys. Rev. B*. 1992, **46**, 6671–6687.
